# Supplementary material for: Hepatoprotective and Antioxidant Potential of Phenolics-Enriched Fraction of Anogeissus acuminata Leaf against Alcohol-Induced Hepatotoxicity in Rats
Source: MDPI journal article supplement (doi:10.3390/medsci10010017), 2022-03-04
Supplement: s1 [file s1]

Table S1. The sequences of primers used in PCR reactions.

| Gene                                     | The sequence of primers (5'–3')                            |
|------------------------------------------|------------------------------------------------------------|
| <b>Bcl-2 F</b><br><b>Bcl-2 R</b>         | 5'GTGGATGACTGAGTACCTGAAC 3'<br>5' CAGCCAGGAGAAATCAAACAG 3' |
| <b>p53 F</b><br><b>p53 R</b>             | 5'GCCATCTACAAGCAGTCACAG 3'<br>5'TCATCCAAATACTCCACACGC 3'   |
| <b>Bax F</b><br><b>Bax R</b>             | 5'AGTAACATGGAGCTGCAGAG 3'<br>5' AGTAGAAAAGGGCGACAACC 3'    |
| <b>Caspase-3 F</b><br><b>Caspase-3 R</b> | 5'ACTGGACTGTGGCATTGAG 3'<br>5'GAGCCATCCTTTGAATTTTCGC 3'    |
| <b>Caspase-9 F</b><br><b>Caspase-9 R</b> | 5' AGTTCCCGGGTGCTGTCTAT 3'<br>5' GCCATGGTCTTTCTGCTCAC 3'   |
| <b>GAPDH F</b><br><b>GAPDH R</b>         | 5' GCATGGCCTTCCGTGTTCC 3'<br>5' GGGTGGTCCAGGGTTTCTTACTC 3  |
